# Supplementary material
Source: publisher site journal article supplement (https://www.dovepress.com/article/423098)
Supplement: Supplementary file 1 [file get_supplementary_file.php]

**Supplementary Table S1.** Patients with adverse events and events of special interest (6-month follow-up)

| **Event** | Number of patients |
| --- | --- |
| Any adverse event | 1 |
| Infection requiring hospitalization | 0 |
| Skin infection | 1 |
| New malignancy | 0 |
| Worsening renal function* | 0 |
| Liver-associated events† | 0 |

*Defined as a doubling of serum creatinine levels from baseline, a decrease of > 50% in the estimated glomerular filtration rate, or the need for renal replacement therapy. †Defined as an elevation in the aspartate transaminase level to more than three times the upper limit of normal beyond the acute phase or Child-Pugh stage II or II liver failure.

**Supplementary Table S2.** Baseline characteristics of eleven patients with very-late-onset myasthenia gravis (VLOMG)

| **patient number** | age at onset（years） | **sex** | **disease course (months)** | **concomitant diseases** | **Muscles initially involved** | **RNS test (+)** | **Thymic abnormalities** |
| --- | --- | --- | --- | --- | --- | --- | --- |
|
| 1 | 73 | female | 2 | hypertension, coronary heart disease, cerebral infarction | Ocular + Bulbar | Facial nerve | (—) |
| 2 | 77 | female | 14 | diabetes, breast cancer | Ocular | Facial nerve | (—) |
| 3 | 79 | female | 36 | hypertension, diabetes, coronary heart disease | Ocular | Facial nerve | (—) |
| 4 | 68 | male | 24 | hypertension, diabetes, coronary heart disease, cerebral infarction | Ocular | Facial nerve | (—) |
| 5 | 78 | female | 0.5 | hypertension, diabetes | Bulbar | Facial nerve | (—) |
| 6 | 66 | male | 0.75 (3 weeks) | hypertension, arrthymia | Ocular | (—) | (—) |
| 7 | 70 | female | 0.5 | hypertension, diabetes, coronary heart disease, hyperlipidemia | Ocular |  | (—) |
| 8 | 71 | male | 2 | cerebral infarction, hyperlipidemia | Ocular |  | (—) |
| 9 | 70 | female | 4 | — | Bulbar |  | thymic hyperplasia |
| 10 | 75 | female | 6 | — | Bulbar |  | thymoma |
| 11 | 81 | male | 0.5 | — | Bulbar |  | (—) |

|  | **MG-ADL** | | | | |  | **QMGS** | | | | | **MGFA Classification** |
| --- | --- | --- | --- | --- | --- | --- | --- | --- | --- | --- | --- | --- |
| **patient number** | **baseline** | **after first dose** | **after second dose** | **after third dose** | **6 months** |  | **baseline** | **after first dose** | **after second dose** | **after third dose** | **6 months** |
| 1 | 13 | 1 | 1 | 1 | 1 |  | 19 | 10 | 3 | 2 | 2 | IIIB |
| 2 | 8 | 7 | 4 | 4 | 3 |  | 18 | 14 | 8 | 8 | 8 | IIB |
| 3 | 8 | 8 | 5 | 3 | NA |  | 16 | 16 | 14 | 9 | NA | IIB |
| 4 | 11 | 4 | 3 | 3 | 3 |  | 16 | 8 | 5 | 5 | 5 | IIIB |
| 5 | 8 | 3 | 3 | 1 | 1 |  | 8 | 3 | 3 | 3 | 3 | IIIB |
| 6 | 1 |  |  |  |  |  |  |  |  |  | 8 | I |
| 7 | na |  |  |  |  |  |  |  |  |  | na | IIIA |
| 8 | 3 |  |  |  |  |  |  |  |  |  | 13 | I |
| 9 | na |  |  |  |  |  |  |  |  |  | na | IIIA |
| 10 | na |  |  |  |  |  |  |  |  |  | na | IIIB |
| 11 | 3 | 1 | 1 | 1 | 1 |  | 7 | 4 | 4 | 4 | 4 | IIB |

|  | Anti-AChR antibody**（**nmol/L**）** | | | | **Treatmen**t | **CD56+ NK cells（×106/mL）** | | | | |
| --- | --- | --- | --- | --- | --- | --- | --- | --- | --- | --- |
| **patient number** | **baseline** | **after first dose** | **after second dose** | **after third dose** | **baseline** | **after first dose** | **after second dose** | **after third dose** | **6 months** |
| 1 | 10.05 | 9.08 | 8.03 | 8.01 | MP + low-dose tocilizumab, pyridostigmine | 0.122 | 0.07 | 0.126 | 0.184 | 0.155 |
| 2 | 0.99 |  |  |  | MP + low-dose tocilizumab, pyridostigmine | 0.459 | 0.302 | 0.707 | 0.474 | 0.203 |
| 3 | 9.03 | 8.01 | 5.76 | 5.39 | MP + low-dose tocilizumab, pyridostigmine | 0.291 | 0.173 | 0.128 | 0.048 |  |
| 4 | 4.99 |  |  |  | MP + low-dose tocilizumab, pyridostigmine | 0.319 | 0.033 | 0.357 | 0.266 | 0.039 |
| 5 | 8.6 |  |  |  | MP + low-dose tocilizumab + pyridostigmine | 0.354 | 0.148 | 0.131 | 0.093 | 0.106 |
| 6 | 8 |  |  |  | IVIg, MP, pyridostigmine |  |  |  |  |  |
| 7 | 0.8 |  |  |  | MP, pyridostigmine |  |  |  |  |  |
| 8 | 8 |  |  |  | MMF, MP, pyridostigmine |  |  |  |  |  |
| 9 | 0.8 |  |  |  | low-dose tocilizumab (once), MP, MMF |  |  |  |  |  |
| 10 | 1.78 |  |  |  | IVIg, MP, tacrolimus, pyridostigmine |  |  |  |  |  |
| 11 | 0.8 |  |  |  | low-dose tocilizumab, pyridostigmine |  |  |  |  |  |

| **patient number** |  | **CD8+ T cells（×106/mL）** | | | | |  | **CD4+ T cells（×106/mL）** | | | | |
| --- | --- | --- | --- | --- | --- | --- | --- | --- | --- | --- | --- | --- |
| **baseline** | **after first dose** | **after second dose** | **after third dose** | **6 months** |  | **baseline** | **after first dose** | **after second dose** | **after third dose** | **6 months** |
|  |  |  |  |  |  |  |  |  |  |  |  |  |
| 1 |  | 0.251 | 0.316 | 0.6 | 0.655 | 0.334 |  | 0.865 | 1.201 | 1.245 | 2.157 | 0.797 |
| 2 |  | 0.299 | 0.269 | 0.516 | 0.343 | 0.228 |  | 0.659 | 0.551 | 0.902 | 0.569 | 0.536 |
| 3 |  | 0.193 | 0.421 | 0.415 | 0.137 |  |  | 0.607 | 1.09 | 0.881 | 0.224 |  |
| 4 |  | 0.323 | 0.206 | 0.147 | 0.362 | 0.211 |  | 1.022 | 1.174 | 0.731 | 0.97 | 0.788 |
| 5 |  | 0.423 | 0.334 | 0.381 | 0.336 | 0.409 |  | 0.594 | 0.523 | 0.361 | 0.543 | 0.699 |
| 6 |  |  |  |  |  |  |  |  |  |  |  |  |
| 7 |  |  |  |  |  |  |  |  |  |  |  |  |
| 8 |  |  |  |  |  |  |  |  |  |  |  |  |
| 9 |  |  |  |  |  |  |  |  |  |  |  |  |
| 10 |  |  |  |  |  |  |  |  |  |  |  |  |
| 11 |  |  |  |  |  |  |  |  |  |  |  |  |


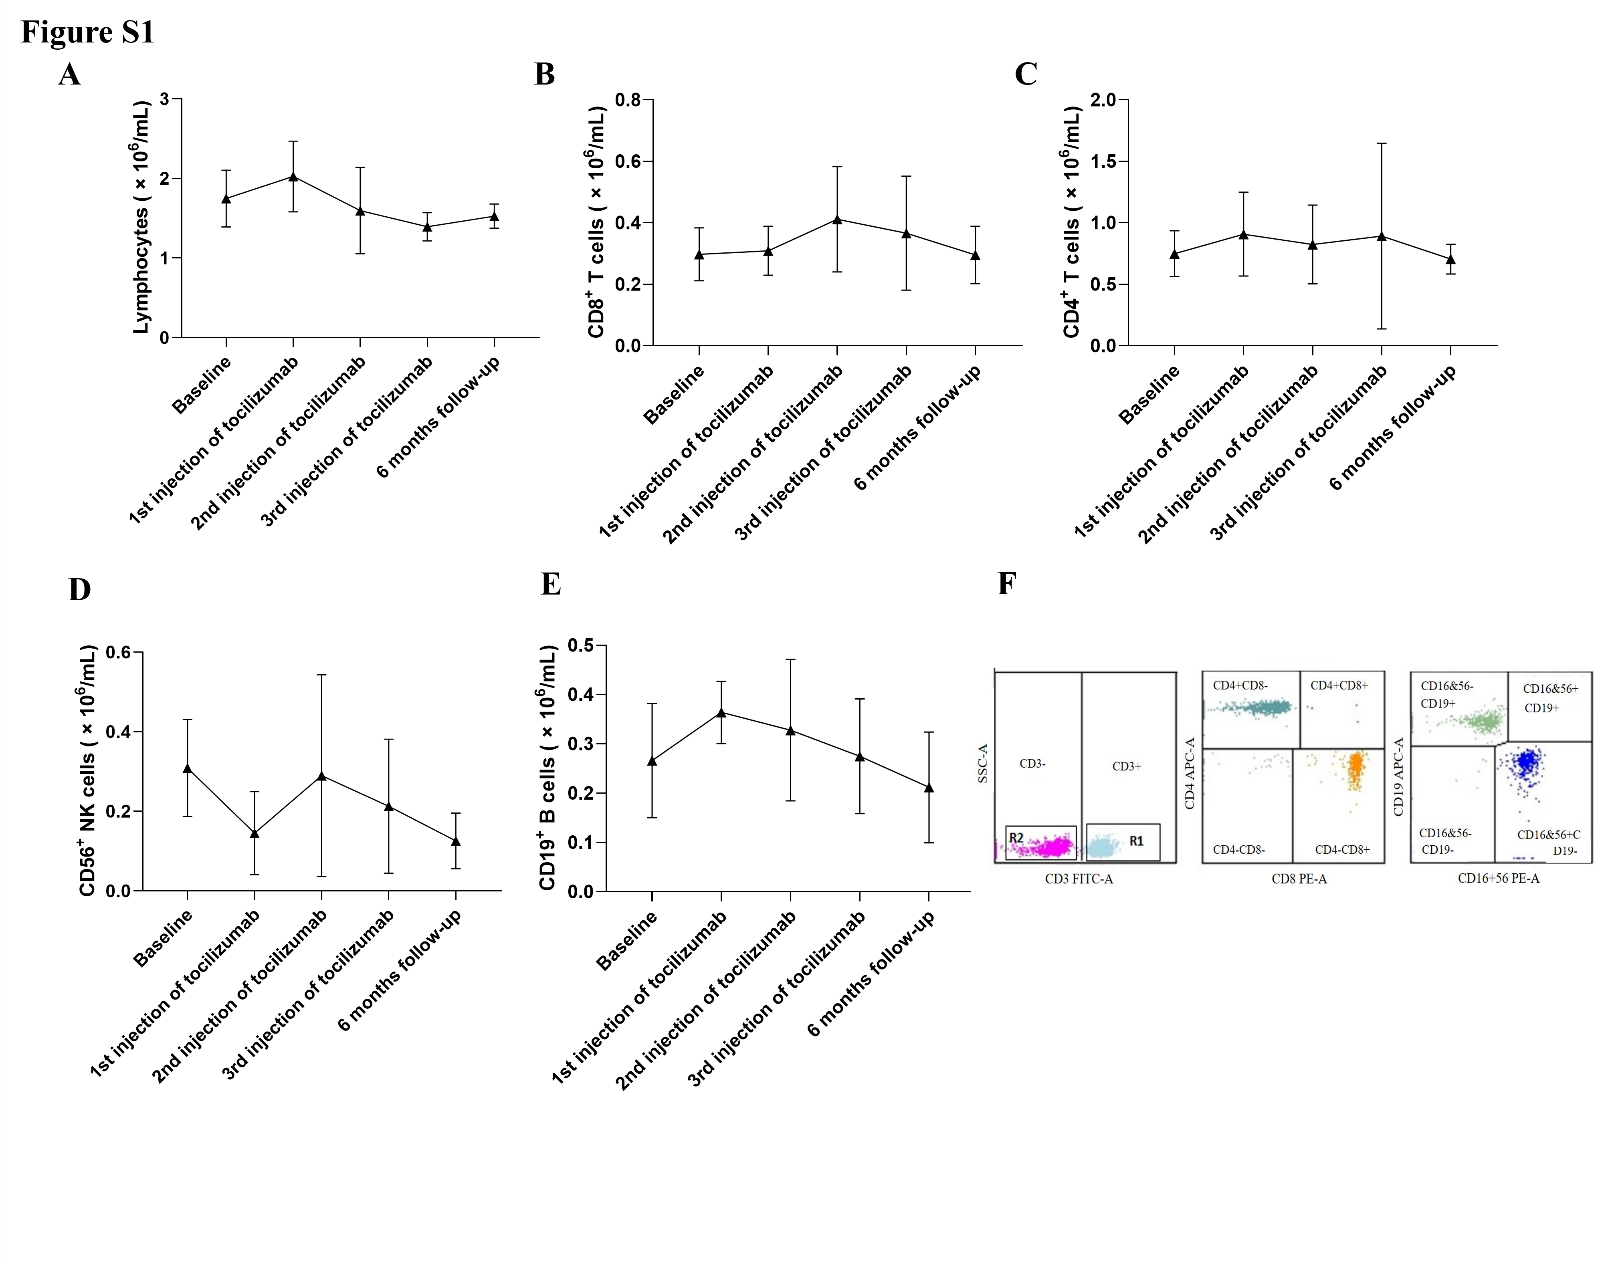


**Supplementary Figure S1.** Dynamic changes in blood lymphocyte subsets. Changes in (A) blood lymphocyte and (B-E) lymphocyte subset counts were observed in five patients with very-late-onset myasthenia gravis (VLOMG) before treatment (baseline) and at the time of the first, second, and third doses of tocilizumab, as well as at 6 months after treatment. F showed Gating method of lymphocyte and subset.
